# Supplementary material
Source: HighWire-hosted journal article supplement (https://jitc.bmj.com/content/8/1/e000368)
Supplement: inline-supplementary-material-3 [file inline-supplementary-material-3.pdf]

Supplementary Table 2:  
Tabulation of Samples from the Metastatic Melanoma Study

| Patient ID | Flow Cytometry |        | TCR Sequencing |        |
|------------|----------------|--------|----------------|--------|
|            | Week 0         | Week 3 | Week 0         | Week 3 |
| 03015-01   | x              | x      | x              | x      |
| 03015-02   | x              | x      | x              | x      |
| 03015-03   | x              | x      | x              | x      |
| 03015-04   | x              | x      | x              | x      |
| 03015-05   | x              | x      | x              | x      |
| 03015-06   | x              | x      | x              | x      |
| 03015-07   | x              | x      | x              | x      |
| 03015-08   | x              | x      | x              | x      |
| 03015-09   | x              | x      | x              | x      |
| 03015-10   | x              | x      | x              | x      |
| 03015-11   | x              | x      | x              | x      |
| 03015-12   | x              | x      | x              | x      |
| 03015-13   | x              | x      | x              | x      |
| 03015-14   | x              | x      | x              | x      |
| 03015-15   | x              | x      | x              | x      |
| 03015-16   | x              | x      | x              | x      |
| 03015-18   | x              | x      | x              | x      |
| 03015-19   | x              | x      | x              | x      |
| 03015-20   | x              | x      | x              | x      |
| 03015-21   | x              | x      | x              | x      |
| 03015-23   | x              | x      | x              | x      |
| Totals     | 21             | 21     | 14             | 14     |

x Sample was present and included in the analysis.

Supplementary Table 2:  
Tabulation of Samples from the Metastatic Melanoma Study

| Patient ID | Flow Cytometry |        | TCR Sequencing |        |
|------------|----------------|--------|----------------|--------|
|            | Week 0         | Week 3 | Week 0         | Week 3 |
| 03015-01   | x              | x      | x              | x      |
| 03015-02   | x              | x      | x              | x      |
| 03015-03   | x              | x      | x              | x      |
| 03015-04   | x              | x      | x              | x      |
| 03015-05   | x              | x      | x              | x      |
| 03015-06   | x              | x      | x              | x      |
| 03015-07   | x              | x      | x              | x      |
| 03015-08   | x              | x      | x              | x      |
| 03015-09   | x              | x      | x              | x      |
| 03015-10   | x              | x      | x              | x      |
| 03015-11   | x              | x      | x              | x      |
| 03015-12   | x              | x      | x              | x      |
| 03015-13   | x              | x      | x              | x      |
| 03015-14   | x              | x      | x              | x      |
| 03015-15   | x              | x      | x              | x      |
| 03015-16   | x              | x      | x              | x      |
| 03015-18   | x              | x      | x              | x      |
| 03015-19   | x              | x      | x              | x      |
| 03015-20   | x              | x      | x              | x      |
| 03015-21   | x              | x      | x              | x      |
| 03015-23   | x              | x      | x              | x      |
| Totals     | 21             | 21     | 14             | 14     |

x Sample was present and included in the analysis.

Supplementary Table 2:  
Tabulation of Samples from the Metastatic Melanoma Study

| Patient ID | Flow Cytometry |        | TCR Sequencing |        |
|------------|----------------|--------|----------------|--------|
|            | Week 0         | Week 3 | Week 0         | Week 3 |
| 03015-01   | x              | x      | x              | x      |
| 03015-02   | x              | x      | x              | x      |
| 03015-03   | x              | x      | x              | x      |
| 03015-04   | x              | x      | x              | x      |
| 03015-05   | x              | x      | x              | x      |
| 03015-06   | x              | x      | x              | x      |
| 03015-07   | x              | x      | x              | x      |
| 03015-08   | x              | x      | x              | x      |
| 03015-09   | x              | x      | x              | x      |
| 03015-10   | x              | x      | x              | x      |
| 03015-11   | x              | x      | x              | x      |
| 03015-12   | x              | x      | x              | x      |
| 03015-13   | x              | x      | x              | x      |
| 03015-14   | x              | x      | x              | x      |
| 03015-15   | x              | x      | x              | x      |
| 03015-16   | x              | x      | x              | x      |
| 03015-18   | x              | x      | x              | x      |
| 03015-19   | x              | x      | x              | x      |
| 03015-20   | x              | x      | x              | x      |
| 03015-21   | x              | x      | x              | x      |
| 03015-23   | x              | x      | x              | x      |
| Totals     | 21             | 21     | 14             | 14     |

x Sample was present and included in the analysis.
